# Supplementary material for: The identification of gene signature and critical pathway associated with childhood-onset type 2 diabetes
Source: PeerJ. 2019 Feb 6;7:e6343. doi: 10.7717/peerj.6343 (PMC6368838; doi:10.7717/peerj.6343)
Supplement: Dataset S3 — The raw results obtained by PPI analysis were exported by the GeneMANIA plugin in Cytoscape. [file peerj-07-6343-s005.csv]

SUID	AverageShortestPathLength	BetweennessCentrality	ClosenessCentrality	ClusteringCoefficient	Degree	Eccentricity	Ensembl Gene ID	Ensembl Protein ID	Entrez Gene ID	gene name	Degree	IsSingleNode	log score	name	NeighborhoodConnectivity	node type	NumberOfDirectedEdges	NumberOfUndirectedEdges	PartnerOfMultiEdgedNodePairs	Radiality	RefSeq mRNA ID	RefSeq Protein ID	score	selected	SelfLoops	shared name	Stress	Synonym	TopologicalCoefficient	Uniprot ID
62	2.98780488	0.01359584	0.33469388	0.16666667	4	5	ENSG00000163421	ENSP00000295619	60675	PROK2	4	FALSE	-0.220436927	H__sapiens__1_-711996	6.5	query	0	4	0	0.66869919	NM_021935	NP_068754	0.802168233	FALSE	0	H__sapiens__1_-711996	230	PK2	0.28571429	Q9HC23
63	3.01219512	0.00547478	0.33198381	0	3	5	ENSG00000140932	ENSP00000454319	146225	CMTM2	3	FALSE	-0.146276631	H__sapiens__1_-709028	6.66666667	query	0	3	0	0.66463415	NM_144673	NP_653274	0.863918683	FALSE	0	H__sapiens__1_-709028	104	MGC39436	0.33333333	Q8TAZ6
65	3.30487805	0.00486	0.30258303	0.16666667	4	5	ENSG00000146592	ENSP00000440429	9586	CREB5	4	FALSE	-0.326394124	H__sapiens__1_-709859	3.75	query	0	4	0	0.61585366	NM_182899	NP_878902	0.721520763	FALSE	0	H__sapiens__1_-709859	98	H_GS165L15.1	0.325	Q02930
67	3.35365854	0.00139851	0.29818182	0	2	5	ENSG00000132357	ENSP00000371093	84674	CARD6	2	FALSE	-0.314078247	H__sapiens__1_-707557	6	query	0	2	0	0.60772358	NM_032587	NP_115976	0.73046187	FALSE	0	H__sapiens__1_-707557	34	CINCIN1	0.55555556	Q9BX69
69	2.84146341	0.00824942	0.35193133	0	4	5	ENSG00000142166	ENSP00000400161	3454	IFNAR1	4	FALSE	-0.345969192	H__sapiens__1_-709196	6.5	query	0	4	0	0.69308943	NM_000629	NP_000620	0.707534285	FALSE	0	H__sapiens__1_-709196	188	IFRC	0.275	P17181
71	2.98780488	0.0335001	0.33469388	0	4	5	ENSG00000101421	ENSP00000217402	128866	CHMP4B	4	FALSE	-0.422883902	H__sapiens__1_-703502	4.75	query	0	4	0	0.66869919	NM_176812	NP_789782	0.655154691	FALSE	0	H__sapiens__1_-703502	578	VPS32B	0.25	Q9H444
72	3.97560976	0	0.25153374	0	1	6	ENSG00000280962	ENSP00000487512	80824	DUSP16	1	FALSE	-0.196127698	H__sapiens__1_-704850	4	query	0	1	0	0.50406504	NM_030640	NP_085143	0.821907272	FALSE	0	H__sapiens__1_-704850	0	MKP7	0	Q9BY84
74	2.73170732	0.01406398	0.36607143	0.2	5	5	ENSG00000170006	ENSP00000482376	201799	TMEM154	5	FALSE	-0.427091518	H__sapiens__1_-713728	7.6	query	0	5	0	0.71138211	NM_152680	NP_689893	0.652403843	FALSE	0	H__sapiens__1_-713728	344	FLJ32028	0.26666667	Q6P9G4
75	2.84146341	0.03094844	0.35193133	0.1	5	5	ENSG00000147251	ENSP00000488503	139818	DOCK11	5	FALSE	-0.32838154	H__sapiens__1_-709945	6.2	query	0	5	0	0.69308943	NM_144658	NP_653259	0.720088225	FALSE	0	H__sapiens__1_-709945	660	ZIZ2	0.25454545	Q5JSL3
77	2.57317073	0.03787522	0.38862559	0.04761905	7	4	ENSG00000158636	ENSP00000436968	56946	EMSY	7	FALSE	-0.431576303	H__sapiens__1_-711241	6.42857143	query	0	7	0	0.73780488	NM_020193	NP_064578	0.649484503	FALSE	0	H__sapiens__1_-711241	658	C11orf30	0.1843318	Q7Z589
78	3.56097561	0	0.28082192	0	1	5	ENSG00000168264	ENSP00000355569	359948	IRF2BP2	1	FALSE	-0.370505291	H__sapiens__1_-713313	7	query	0	1	0	0.57317073	NM_182972	NP_892017	0.690385397	FALSE	0	H__sapiens__1_-713313	0	IRF-2BP2	0	Q7Z5L9
80	2.92682927	0.00287935	0.34166667	0.33333333	3	5	ENSG00000177409	ENSP00000484397	219285	SAMD9L	3	FALSE	-0.448322398	H__sapiens__1_-715292	8.33333333	query	0	3	0	0.67886179	NM_152703	NP_689916	0.638698736	FALSE	0	H__sapiens__1_-715292	76	KIAA2005	0.38095238	Q8IVG5
81	2.98780488	0.006317	0.33469388	0.33333333	3	4	ENSG00000111912	ENSP00000408211	135112	NCOA7	3	FALSE	-0.295632533	H__sapiens__1_-704962	7	query	0	3	0	0.66869919	NM_181782	NP_861447	0.744060796	FALSE	0	H__sapiens__1_-704962	92	TLDC4	0.37037037	Q8NI08
83	2.2804878	0.05694036	0.43850267	0.19230769	13	4	ENSG00000118518	ENSP00000479890	81847	RNF146	13	FALSE	-0.4961949	H__sapiens__1_-705808	8.38461538	query	0	13	0	0.78658537	NM_030963	NP_112225	0.608842966	FALSE	0	H__sapiens__1_-705808	1328	DKFZp434O1427	0.16615385	Q9NTX7
84	2.68292683	0.02072059	0.37272727	0.1	5	4	ENSG00000152457	ENSP00000413180	64421	DCLRE1C	5	FALSE	-0.450767025	H__sapiens__1_-710536	7.6	query	0	5	0	0.7195122	NM_022487	NP_071932	0.637139262	FALSE	0	H__sapiens__1_-710536	396	SNM1C	0.25	Q96SD1
86	2.36585366	0.02382466	0.42268041	0.25454545	12	5	ENSG00000188419	ENSP00000484306	1121	CHM	12	FALSE	-0.5034793	H__sapiens__1_-717726	9.36363636	query	0	12	1	0.77235772	NM_001320959	NP_001307888	0.604424024	FALSE	0	H__sapiens__1_-717726	714	TCD	0.20867769	P24386
87	2.43902439	0.01464587	0.41	0.0952381	7	4	ENSG00000141425	ENSP00000468209	55197	RPRD1A	7	FALSE	-0.423168369	H__sapiens__1_-709096	9.57142857	query	0	7	0	0.7601626	NM_018170	NP_060640	0.654968348	FALSE	0	H__sapiens__1_-709096	402	P15RS	0.22857143	Q96P16
89	2.46341463	0.02317316	0.40594059	0.14285714	7	4	ENSG00000144228	ENSP00000410201	339745	SPOPL	7	FALSE	-0.525232507	H__sapiens__1_-709532	8.57142857	query	0	7	0	0.75609756	NM_001001664	NP_001001664	0.591417839	FALSE	0	H__sapiens__1_-709532	584	BTBD33	0.21245421	Q6IQ16
91	2.45121951	0.03890437	0.4079602	0.16363636	12	4	ENSG00000084733	ENSP00000264710	10890	RAB10	12	FALSE	-0.532487139	H__sapiens__1_-702615	6.90909091	query	0	12	1	0.75813008	NM_016131	NP_057215	0.587142846	FALSE	0	H__sapiens__1_-702615	920		0.17464115	P61026
92	2.62195122	0.00726822	0.38139535	0.4	5	5	ENSG00000135241	ENSP00000410804	50640	PNPLA8	5	FALSE	-0.301464549	H__sapiens__1_-708020	11.2	query	0	5	0	0.7296748	NM_015723	NP_056538	0.739734051	FALSE	0	H__sapiens__1_-708020	198	iPLA2gamma	0.30555556	Q9NP80
94	2.30487805	0.04254188	0.43386243	0.08888889	12	4	ENSG00000115159	ENSP00000440892	2820	GPD2	12	FALSE	-0.497815946	H__sapiens__1_-705355	8.2	query	0	12	2	0.78252033	NM_001083112	NP_001076581	0.607856803	FALSE	0	H__sapiens__1_-705355	990		0.17272727	P43304
96	2.42682927	0.04427437	0.4120603	0.07142857	8	4	ENSG00000172716	ENSP00000468602	91607	SLFN11	8	FALSE	-0.535151203	H__sapiens__1_-714362	8.5	query	0	8	0	0.76219512	NM_152270	NP_689483	0.585580742	FALSE	0	H__sapiens__1_-714362	1108	FLJ34922	0.19512195	Q7Z7L1
98	2.84146341	0.0099232	0.35193133	0.16666667	4	5	ENSG00000127954	ENSP00000394399	79689	STEAP4	4	FALSE	-0.535885337	H__sapiens__1_-706953	8	query	0	4	0	0.69308943	NM_024636	NP_078912	0.585151005	FALSE	0	H__sapiens__1_-706953	180	TNFAIP9	0.3	Q687X5
99	3	0.01132653	0.33333333	0.1	5	5	ENSG00000173535	ENSP00000428235	8794	TNFRSF10C	5	FALSE	-0.25879826	H__sapiens__1_-714537	5	query	0	5	0	0.66666667	NM_003841	NP_003832	0.771978746	FALSE	0	H__sapiens__1_-714537	250	TRID	0.275	O14798
101	2.46341463	0.02538586	0.40594059	0.17857143	9	5	ENSG00000108590	ENSP00000459723	51003	MED31	9	FALSE	-0.540550745	H__sapiens__1_-704536	10.125	query	0	9	1	0.75609756	NM_016060	NP_057144	0.582427395	FALSE	0	H__sapiens__1_-704536	714	Soh1	0.24085366	Q9Y3C7
102	3.13414634	0.00352713	0.31906615	0	3	5	ENSG00000130921	ENSP00000444843	91574	C12orf65	3	FALSE	-0.339184154	H__sapiens__1_-707348	6	query	0	3	0	0.64430894	NM_152269	NP_689482	0.712351254	FALSE	0	H__sapiens__1_-707348	72	SPG55	0.35714286	Q9H3J6
104	2.37804878	0.03008572	0.42051282	0.07142857	8	4	ENSG00000112893	ENSP00000261483	4124	MAN2A1	8	FALSE	-0.542432444	H__sapiens__1_-705104	8.875	query	0	8	0	0.7703252	NM_002372	NP_002363	0.581332473	FALSE	0	H__sapiens__1_-705104	716	MANA2	0.19476744	Q16706
106	2.09756098	0.09885804	0.47674419	0.13186813	14	4	ENSG00000148572	ENSP00000397502	29982	NRBF2	14	FALSE	-0.571753115	H__sapiens__1_-710104	8.92857143	query	0	14	0	0.81707317	NM_030759	NP_110386	0.564534876	FALSE	0	H__sapiens__1_-710104	2332	FLJ30395	0.14642857	Q96F24
107	3.08536585	0	0.32411067	0	1	5	ENSG00000169193	ENSP00000406558	90693	CCDC126	1	FALSE	-0.135976522	H__sapiens__1_-713537	14	query	0	1	0	0.65243902	NM_138771	NP_620126	0.872863125	FALSE	0	H__sapiens__1_-713537	0	FLJ23031	0	Q96EE4
109	2.51219512	0.05780576	0.39805825	0.07142857	8	4	ENSG00000129292	ENSP00000487068	51105	PHF20L1	8	FALSE	-0.400861232	H__sapiens__1_-707111	6.625	query	0	8	0	0.74796748	NM_198513	NP_940915	0.669742994	FALSE	0	H__sapiens__1_-707111	1094	TDRD20B	0.17647059	A8MW92
114	2.20731707	0.07950843	0.45303867	0.14285714	16	4	ENSG00000179933	ENSP00000450861	55017	C14orf119	16	FALSE	-0.650663961	H__sapiens__1_-715774	7.66666667	query	0	16	1	0.79878049	NM_017924	NP_060394	0.521699274	FALSE	0	H__sapiens__1_-715774	2002	FLJ20671	0.15238095	Q9NWQ9
116	2.23170732	0.11250537	0.44808743	0.07692308	15	4	ENSG00000105835	ENSP00000390896	10135	NAMPT	15	FALSE	-0.685259818	H__sapiens__1_-704180	5.85714286	query	0	15	1	0.79471545	NM_005746	NP_005737	0.503959275	FALSE	0	H__sapiens__1_-704180	2174	PBEF1	0.11370262	P43490
120	2.37804878	0.05531689	0.42051282	0.02777778	9	4	ENSG00000119048	ENSP00000426364	7320	UBE2B	9	FALSE	-0.46368255	H__sapiens__1_-705856	6.88888889	query	0	9	0	0.7703252	NM_003337	NP_003328	0.628963187	FALSE	0	H__sapiens__1_-705856	1138	RAD6B	0.16081871	P63146
121	3.36585366	0	0.29710145	0	1	5	ENSG00000087448	ENSP00000444748	57542	KLHL42	1	FALSE	-0.246595076	H__sapiens__1_-702721	9	query	0	1	0	0.60569106	NM_020782	NP_065833	0.78145706	FALSE	0	H__sapiens__1_-702721	0	KLHDC5	0	Q9P2K6
123	2.6097561	0.01422267	0.38317757	0.14285714	7	4	ENSG00000152700	ENSP00000426335	51128	SAR1B	7	FALSE	-0.451420142	H__sapiens__1_-710569	8.28571429	query	0	7	0	0.73170732	NM_016103	NP_057187	0.636723272	FALSE	0	H__sapiens__1_-710569	386	SARA2	0.23809524	Q9Y6B6
125	2.56097561	0.00590894	0.39047619	0	4	4	ENSG00000113732	ENSP00000430896	8992	ATP6V0E1	4	FALSE	-0.473195844	H__sapiens__1_-705205	11.25	query	0	4	0	0.7398374	NM_003945	NP_003936	0.623008047	FALSE	0	H__sapiens__1_-705205	212	M9.2	0.3203125	O15342
127	2.48780488	0.02918148	0.40196078	0.10714286	9	4	ENSG00000116539	ENSP00000449283	693140	ASH1L	9	FALSE	-0.530812002	H__sapiens__1_-705562	7.75	query	0	9	1	0.75203252	NM_018489	NP_060959	0.588127215	FALSE	0	H__sapiens__1_-705562	590	KMT2H	0.19594595	Q9NR48
128	2.35365854	0.04833048	0.42487047	0.21818182	12	4	ENSG00000283024	ENSP00000489455	84896	ATAD1	12	FALSE	-0.467408436	H__sapiens__1_-708615	8.36363636	query	0	12	1	0.77439024	NM_032810	NP_116199	0.626624102	FALSE	0	H__sapiens__1_-708615	1074	FLJ14600	0.17786561	Q8NBU5
130	2.82926829	0.0075382	0.35344828	0	3	4	ENSG00000147454	ENSP00000429200	51312	SLC25A37	3	FALSE	-0.54602302	H__sapiens__1_-709969	8.66666667	query	0	3	0	0.69512195	NM_016612	NP_057696	0.579248897	FALSE	0	H__sapiens__1_-709969	148	MSCP	0.38333333	Q9NYZ2
132	2.95121951	0.01683619	0.33884298	0	4	4	ENSG00000122257	ENSP00000481477	5930	RBBP6	4	FALSE	-0.408555582	H__sapiens__1_-706234	5.5	query	0	4	0	0.67479675	NM_032626	NP_116015	0.664609531	FALSE	0	H__sapiens__1_-706234	366	SNAMA	0.28125	Q7Z6E9
134	2.79268293	0.0286529	0.3580786	0	4	5	ENSG00000141446	ENSP00000484873	114799	ESCO1	4	FALSE	-0.397591155	H__sapiens__1_-709104	8.5	query	0	4	0	0.70121951	NM_052911	NP_443143	0.67193669	FALSE	0	H__sapiens__1_-709104	584	KIAA1911	0.26785714	Q5FWF5
136	3.7804878	0	0.26451613	0	1	6	ENSG00000112787	ENSP00000490180	57666	FBRSL1	1	FALSE	-0.349115959	H__sapiens__1_-705093	4	query	0	1	0	0.53658537	NM_001142641	NP_001136113	0.705311339	FALSE	0	H__sapiens__1_-705093	0	KIAA1545	0	Q9HCM7
138	2.32926829	0.02882696	0.42931937	0.28888889	11	4	ENSG00000053770	ENSP00000473837	55745	AP5M1	11	FALSE	-0.415848753	H__sapiens__1_-701690	10.4	query	0	11	1	0.77845528	NM_018229	NP_060699	0.659780053	FALSE	0	H__sapiens__1_-701690	900	MUDENG	0.22173913	Q9H0R1
140	2.41463415	0.02389283	0.41414141	0.25	8	4	ENSG00000168538	ENSP00000422915	60684	TRAPPC11	8	FALSE	-0.458823553	H__sapiens__1_-713387	9.25	query	0	8	0	0.76422764	NM_199053	NP_951008	0.632026754	FALSE	0	H__sapiens__1_-713387	556	gry	0.2172619	Q7Z392
142	2.32926829	0.05785125	0.42931937	0.20879121	14	4	ENSG00000135297	ENSP00000430660	25821	MTO1	14	FALSE	-0.507411139	H__sapiens__1_-708028	8.14285714	query	0	14	0	0.77845528	NM_133645	NP_598400	0.602052192	FALSE	0	H__sapiens__1_-708028	1566		0.18181818	Q9Y2Z2
144	2.63414634	0.01922444	0.37962963	0.04761905	7	4	ENSG00000132313	ENSP00000473925	51318	MRPL35	7	FALSE	-0.529147555	H__sapiens__1_-707548	7.28571429	query	0	7	0	0.72764228	NM_145644	NP_663619	0.589106937	FALSE	0	H__sapiens__1_-707548	444		0.21198157	Q9NZE8
147	2.32926829	0.06771629	0.42931937	0.06666667	11	4	ENSG00000100744	ENSP00000451820	51527	GSKIP	11	FALSE	-0.544913426	H__sapiens__1_-703358	7.1	query	0	11	1	0.77845528	NM_016472	NP_057556	0.579891985	FALSE	0	H__sapiens__1_-703358	1442	C14orf129	0.15348837	Q9P0R6
149	2.70731707	0.00434931	0.36936937	0.16666667	4	4	ENSG00000171988	ENSP00000444682	221037	JMJD1C	4	FALSE	-0.464031375	H__sapiens__1_-714198	8.5	query	0	4	0	0.71544715	NM_032776	NP_116165	0.628743827	FALSE	0	H__sapiens__1_-714198	94	TRIP8	0.2962963	Q15652
151	2.57317073	0.0205126	0.38862559	0	5	4	ENSG00000120738	ENSP00000239938	1958	EGR1	5	FALSE	-0.47205262	H__sapiens__1_-706078	8.4	query	0	5	0	0.73780488	NM_001964	NP_001955	0.623720692	FALSE	0	H__sapiens__1_-706078	504	ZIF-268	0.25517241	P18146
154	3.36585366	0.00195975	0.29710145	0	2	5	ENSG00000141905	ENSP00000466647	4782	NFIC	2	FALSE	-0.490991902	H__sapiens__1_-709172	4.5	query	0	2	0	0.60569106	NM_205843	NP_995315	0.61201903	FALSE	0	H__sapiens__1_-709172	50	NFI	0.5	P08651
155	2.73170732	0.02321343	0.36607143	0.06666667	6	4	ENSG00000069329	ENSP00000461469	55737	VPS35	6	FALSE	-0.397757932	H__sapiens__1_-702046	7.33333333	query	0	6	0	0.71138211	NM_018206	NP_060676	0.671824635	FALSE	0	H__sapiens__1_-702046	518	PARK17	0.22988506	Q96QK1
158	3.01219512	0.00957849	0.33198381	0	4	4	ENSG00000078618	ENSP00000444416	4898	NRDC	4	FALSE	-0.520767578	H__sapiens__1_-702407	4.75	query	0	4	0	0.66463415	NM_002525	NP_002516	0.594064382	FALSE	0	H__sapiens__1_-702407	176	NRD1	0.26785714	O43847
160	2.98780488	0.01643875	0.33469388	0	4	5	ENSG00000167491	ENSP00000477171	54815	GATAD2A	4	FALSE	-0.459278127	H__sapiens__1_-713099	4.75	query	0	4	0	0.66869919	NM_017660	NP_060130	0.631739517	FALSE	0	H__sapiens__1_-713099	232	p66alpha	0.25	Q86YP4
162	2.30487805	0.06161327	0.43386243	0.11111111	11	4	ENSG00000059728	ENSP00000443935	4084	MXD1	11	FALSE	-0.596638613	H__sapiens__1_-701778	7.9	query	0	11	1	0.78252033	NM_002357	NP_002348	0.550659508	FALSE	0	H__sapiens__1_-701778	1282	bHLHc58	0.16304348	Q05195
167	3.26829268	0	0.30597015	0	1	5	ENSG00000172765	ENSP00000427352	23023	TMCC1	1	FALSE	-0.321249423	H__sapiens__1_-714376	13	query	0	1	0	0.62195122	NM_001128224	NP_001121696	0.725242336	FALSE	0	H__sapiens__1_-714376	0	KIAA0779	0	O94876
169	2.31707317	0.02384852	0.43157895	0.14285714	9	4	ENSG00000113532	ENSP00000428914	7903	ST8SIA4	9	FALSE	-0.467967946	H__sapiens__1_-705177	10.625	query	0	9	1	0.7804878	NM_175052	NP_778222	0.626273598	FALSE	0	H__sapiens__1_-705177	720	SIAT8D	0.21173469	Q92187
171	2.20731707	0.03445788	0.45303867	0.28787879	13	4	ENSG00000004766	ENSP00000443104	55610	VPS50	13	FALSE	-0.497447824	H__sapiens__1_-701031	10.66666667	query	0	13	1	0.79878049	NM_024553	NP_078829	0.60808061	FALSE	0	H__sapiens__1_-701031	1098	VPS54L	0.19968553	Q96JG6
173	2.63414634	0.01979846	0.37962963	0	6	4	ENSG00000119922	ENSP00000490935	3433	IFIT2	6	FALSE	-0.287723809	H__sapiens__1_-705966	7.66666667	query	0	6	0	0.72764228	NM_001547	NP_001538	0.749968698	FALSE	0	H__sapiens__1_-705966	404	ISG-54K	0.24691358	P09913
176	2.37804878	0.04147075	0.42051282	0.13888889	10	4	ENSG00000081320	ENSP00000475843	9262	STK17B	10	FALSE	-0.52582612	H__sapiens__1_-702511	8.33333333	query	0	10	1	0.7703252	NM_004226	NP_004217	0.59106687	FALSE	0	H__sapiens__1_-702511	958	DRAK2	0.18024691	O94768
177	2.47560976	0.02515881	0.40394089	0.21428571	9	5	ENSG00000139436	ENSP00000473637	9815	GIT2	9	FALSE	-0.363486685	H__sapiens__1_-708820	10	query	0	9	1	0.75406504	NM_139201	NP_631940	0.695247985	FALSE	0	H__sapiens__1_-708820	750	PKL	0.23511905	Q14161
182	2.35365854	0.0494678	0.42487047	0.10909091	11	4	ENSG00000139163	ENSP00000446292	55500	ETNK1	11	FALSE	-0.538880007	H__sapiens__1_-708771	7.18181818	query	0	11	0	0.77439024	NM_018638	NP_061108	0.583401292	FALSE	0	H__sapiens__1_-708771	1142	EKI1	0.15856237	Q9HBU6
187	2.24390244	0.07391534	0.44565217	0.07575758	13	4	ENSG00000105851	ENSP00000419260	5294	PIK3CG	13	FALSE	-0.542500454	H__sapiens__1_-704182	7.41666667	query	0	13	1	0.79268293	NM_002649	NP_002640	0.581292937	FALSE	0	H__sapiens__1_-704182	1624		0.14583333	P48736
191	1	0	1	0	1	1	ENSG00000173517	ENSP00000457880	79834	PEAK1	1	FALSE	-0.353528218	H__sapiens__1_-714534	1	query	0	1	0	1	NM_024776	NP_079052	0.702206178	FALSE	0	H__sapiens__1_-714534	0	sgk269	0	Q9H792
192	1	0	1	0	1	1	ENSG00000072952	ENSP00000453013	10335	MRVI1	1	FALSE	-0.303545067	H__sapiens__1_-702188	1	query	0	1	0	1	NM_130385	NP_569056	0.73819662	FALSE	0	H__sapiens__1_-702188	0	JAW1L	0	Q9Y6F6
194	2.76829268	0.02342075	0.36123348	0.26666667	7	4	ENSG00000197050	ENSP00000468736	147923	ZNF420	7	FALSE	-0.438614122	H__sapiens__1_-718321	8	query	0	7	1	0.70528455	NM_144689	NP_653290	0.644929596	FALSE	0	H__sapiens__1_-718321	608	FLJ32191	0.27380952	Q8TAQ5
199	3.31707317	8.97E-04	0.30147059	0	2	5	ENSG00000052841	ENSP00000473320	55761	TTC17	2	FALSE	-0.480256115	H__sapiens__1_-701678	5.5	query	0	2	0	0.61382114	NM_018259	NP_060729	0.618624932	FALSE	0	H__sapiens__1_-701678	12	FLJ10890	0.5	Q96AE7
201	3.01219512	0.00354505	0.33198381	0	3	5	ENSG00000124571	ENSP00000426185	57510	XPO5	3	FALSE	-0.292919525	H__sapiens__1_-706532	8	query	0	3	0	0.66463415	NM_020750	NP_065801	0.746082179	FALSE	0	H__sapiens__1_-706532	82	KIAA1291	0.36842105	Q9HAV4
203	2.67073171	0.00341917	0.37442922	0.5	4	4	ENSG00000137168	ENSP00000362803	51645	PPIL1	4	FALSE	-0.421002687	H__sapiens__1_-708409	12.5	query	0	4	0	0.72154472	NM_016059	NP_057143	0.656388338	FALSE	0	H__sapiens__1_-708409	138		0.3828125	Q9Y3C6
216	2.81707317	0.01925347	0.35497835	0.16666667	4	4	ENSG00000123200	ENSP00000480658	23091	ZC3H13	4	FALSE	-0.533057589	H__sapiens__1_-706343	8.75	query	0	4	0	0.69715447	NM_015070	NP_055885	0.586808006	FALSE	0	H__sapiens__1_-706343	390	KIAA0853	0.31730769	Q5T200
228	3.03658537	0.00319386	0.32931727	0	3	5	ENSG00000073331	ENSP00000426044	80216	ALPK1	3	FALSE	-0.250093347	H__sapiens__1_-702200	6.33333333	query	0	3	0	0.66056911	NM_025144	NP_079420	0.778728088	FALSE	0	H__sapiens__1_-702200	76	KIAA1527	0.35555556	Q96QP1
230	3.53658537	8.20E-04	0.28275862	0	3	5	ENSG00000197024	ENSP00000420418	57541	ZNF398	3	FALSE	-0.318894979	H__sapiens__1_-718314	5	query	0	3	1	0.57723577	NM_170686	NP_733787	0.726951891	FALSE	0	H__sapiens__1_-718314	16	ZER6	0.57142857	Q8TD17
233	2.8902439	0.00122897	0.34599156	0.33333333	4	5	ENSG00000122008	ENSP00000426853	51426	POLK	4	FALSE	-0.334655593	H__sapiens__1_-706207	10.5	query	0	4	0	0.68495935	NM_016218	NP_057302	0.715584496	FALSE	0	H__sapiens__1_-706207	58	DINP	0.39423077	Q9UBT6
241	2.80487805	0.00128894	0.35652174	0.33333333	3	4	ENSG00000052795	ENSP00000421488	57600	FNIP2	3	FALSE	-0.327369942	H__sapiens__1_-701676	10.66666667	query	0	3	0	0.69918699	NM_020840	NP_065891	0.720817033	FALSE	0	H__sapiens__1_-701676	28	MAPO1	0.41333333	Q9P278
255	2.45121951	0.02237136	0.4079602	0.24444444	10	4	ENSG00000060749	ENSP00000436870	79832	QSER1	10	FALSE	-0.423161973	H__sapiens__1_-701797	8.6	query	0	10	0	0.75813008	NM_001076786	NP_001070254	0.654972536	FALSE	0	H__sapiens__1_-701797	622	FLJ21924	0.2097561	Q2KHR3
262	3.18292683	0	0.31417625	1	2	5	ENSG00000185262	ENSP00000468297	283991	UBALD2	2	FALSE	-0.385552881	H__sapiens__1_-716955	7.5	query	0	2	0	0.63617886	NM_182565	NP_872371	0.680074532	FALSE	0	H__sapiens__1_-716955	0	MGC29814	0.625	Q8IYN6
264	2.92682927	0.01158844	0.34166667	0	4	5	ENSG00000176018	ENSP00000427683	116068	LYSMD3	4	FALSE	-0.453711404	H__sapiens__1_-714997	5.75	query	0	4	0	0.67886179	NM_198273	NP_938014	0.635266042	FALSE	0	H__sapiens__1_-714997	212	FLJ13542	0.27941176	Q7Z3D4
266	2.34146341	0.0286132	0.42708333	0.27777778	9	4	ENSG00000143633	ENSP00000401677	128061	C1orf131	9	FALSE	-0.463772058	H__sapiens__1_-709439	10.33333333	query	0	9	0	0.77642276	NM_152379	NP_689592	0.628906892	FALSE	0	H__sapiens__1_-709439	770	DKFZp547B1713	0.21749409	Q8NDD1
269	2.79268293	0.00157383	0.3580786	0.33333333	3	4	ENSG00000100410	ENSP00000216252	84844	PHF5A	3	FALSE	-0.484092408	H__sapiens__1_-703278	11.66666667	query	0	3	0	0.70121951	NM_032758	NP_116147	0.616256253	FALSE	0	H__sapiens__1_-703278	74	SF3B7	0.4047619	Q7RTV0
271	2.91463415	3.26E-04	0.34309623	0.66666667	3	4	ENSG00000041353	ENSP00000468542	5874	RAB27B	3	FALSE	-0.446733472	H__sapiens__1_-701548	9.33333333	query	0	3	0	0.68089431	NM_004163	NP_004154	0.639714387	FALSE	0	H__sapiens__1_-701548	14		0.46666667	O00194
273	2.46341463	0.01242868	0.40594059	0.14285714	7	4	ENSG00000170448	ENSP00000425812	152518	NFXL1	7	FALSE	-0.36451384	H__sapiens__1_-713827	10.71428571	query	0	7	0	0.75609756	NM_152995	NP_694540	0.694534224	FALSE	0	H__sapiens__1_-713827	446	HOZFP	0.24829932	Q6ZNB6
300	1	0	1	0	1	1	ENSG00000182173	ENSP00000464335	283989	TSEN54	1	FALSE	-0.468470003	H__sapiens__1_-716192	1	query	0	1	0	1	NM_207346	NP_997229	0.625959252	FALSE	0	H__sapiens__1_-716192	0	SEN54L	0	Q7Z6J9
301	1	0	1	0	1	1	ENSG00000172057	ENSP00000464693	94103	ORMDL3	1	FALSE	-0.254056119	H__sapiens__1_-714215	1	query	0	1	0	1	NM_139280	NP_644809	0.775648272	FALSE	0	H__sapiens__1_-714215	0		0	Q8N138
303	2.95121951	0.00991807	0.33884298	0.33333333	3	5	ENSG00000167470	ENSP00000467679	90007	MIDN	3	FALSE	-0.337810057	H__sapiens__1_-713095	8.66666667	query	0	3	0	0.67479675	NM_177401	NP_796375	0.713330767	FALSE	0	H__sapiens__1_-713095	188		0.41666667	Q504T8
328	3.02439024	9.49E-04	0.33064516	0	2	5	ENSG00000176542	ENSP00000420752	205717	USF3	2	FALSE	-0.241108848	H__sapiens__1_-715107	9	query	0	2	0	0.66260163	NM_001009899	NP_001009899	0.785756094	FALSE	0	H__sapiens__1_-715107	30	KIAA2018	0.53333333	Q68DE3
330	3.01219512	6.16E-04	0.33198381	0	3	5	ENSG00000167548	ENSP00000449455	8085	KMT2D	3	FALSE	-0.40039193	H__sapiens__1_-713114	10	query	0	3	1	0.66463415	NM_003482	NP_003473	0.670057379	FALSE	0	H__sapiens__1_-713114	16	TNRC21	0.52941176	O14686
359	3.5	0	0.28571429	0	1	5	ENSG00000073737	ENSP00000473337	10170	DHRS9	1	FALSE	-0.25783146	H__sapiens__1_-702214	8	query	0	1	0	0.58333333	NM_199204	NP_954674	0.772725456	FALSE	0	H__sapiens__1_-702214	0	SDR9C4	0	Q9BPW9
389	3.82926829	0	0.2611465	0	1	6	ENSG00000133030	ENSP00000465902	23164	MPRIP	1	FALSE	-0.363153577	H__sapiens__1_-707686	5	query	0	1	0	0.52845528	NM_201274	NP_958431	0.695479615	FALSE	0	H__sapiens__1_-707686	0	RHOIP3	0	Q6WCQ1
403	0	0	0	0	0	0	ENSG00000162852	ENSP00000355470	163882	CNST	0	TRUE	-0.300849341	H__sapiens__1_-711843	0	query	0	0	0	9.22E+10	NM_152609	NP_689822	0.740189281	FALSE	0	H__sapiens__1_-711843	0	PPP1R64	0	Q6PJW8
404	0	0	0	0	0	0	ENSG00000116205	ENSP00000486433	127428	TCEANC2	0	TRUE	-0.116155539	H__sapiens__1_-705532	0	query	0	0	0	9.22E+10	NM_153035	NP_694580	0.89033673	FALSE	0	H__sapiens__1_-705532	0	FLJ32112	0	Q96MN5
405	0	0	0	0	0	0	ENSG00000180011	ENSP00000463844	284273	ZADH2	0	TRUE	-0.220770373	H__sapiens__1_-715792	0	query	0	0	0	9.22E+10	NM_175907	NP_787103	0.801900797	FALSE	0	H__sapiens__1_-715792	0	MGC45594	0	Q8N4Q0
406	0	0	0	0	0	0	ENSG00000051523	ENSP00000457060	1535	CYBA	0	TRUE	-0.489813	H__sapiens__1_-701668	0	query	0	0	0	9.22E+10	NM_000101	NP_000092	0.612740966	FALSE	0	H__sapiens__1_-701668	0	p22-PHOX	0	P13498
407	0	0	0	0	0	0	ENSG00000198899	ENSP00000354632	4508	MT-ATP6	0	TRUE	-0.276342271	H__sapiens__1_-718961	0	query	0	0	0	9.22E+10		YP_003024031	0.758553256	FALSE	0	H__sapiens__1_-718961	0	Su6m	0	P00846
